# Supplementary material for: 3D macroporous electrode and high-performance in lithium-ion batteries using SnO2 coated on Cu foam
Source: PubMed Central journal article supplement (PMC4698716; doi:10.1038/srep18626), 2016-01-04
Supplement: srep18626-s1.pdf [file srep18626-s1.pdf]

## Supplementary Information for

### **3D macroporous electrode and high-performance in lithium-ion batteries using SnO<sub>2</sub> coated on Cu foam**

Ji Hyun Um<sup>1,2</sup>, Myounggeun Choi<sup>3</sup>, Hyeji Park<sup>3</sup>, Yong-Hun Cho<sup>4</sup>, David C. Dunand<sup>5</sup>, Heeman Choe<sup>3</sup> & Yung-Eun Sung<sup>1,2</sup>

<sup>1</sup>School of Chemical and Biological Engineering, Seoul National University, Seoul 151-742, Republic of Korea

<sup>2</sup>Center for Nanoparticle Research, Institute for Basic Science (IBS), Seoul 151-742, Republic of Korea

<sup>3</sup>School of Advanced Materials Engineering, Kookmin University, Seoul 136-702, Republic of Korea

<sup>4</sup>Department of Chemical Engineering, Kangwon National University, Samcheok 245-711, Republic of Korea

<sup>5</sup>Department of Materials Science and Engineering, Northwestern University, Evanston, IL 60208, USA

Correspondence and requests for materials should be addressed to Y.-H. C. (email: yhun00@kangwon.ac.kr) or to Y.-E. S. (email: ysung@snu.ac.kr)

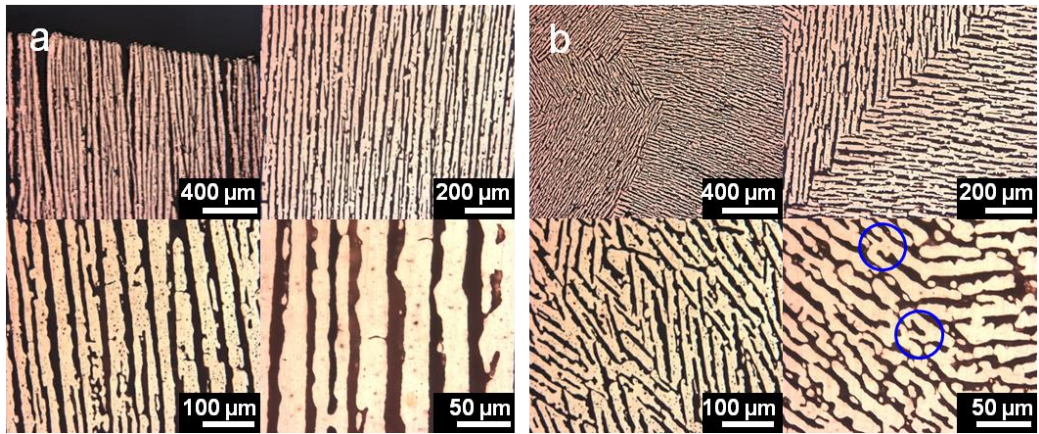

**Supplementary Figure S1** Optical microscopic images of a polished Cu foam, after being cut either (a) vertically or (b) horizontally. The blue circles indicate lamellar bridges crossing the gaps between adjacent lamellae.

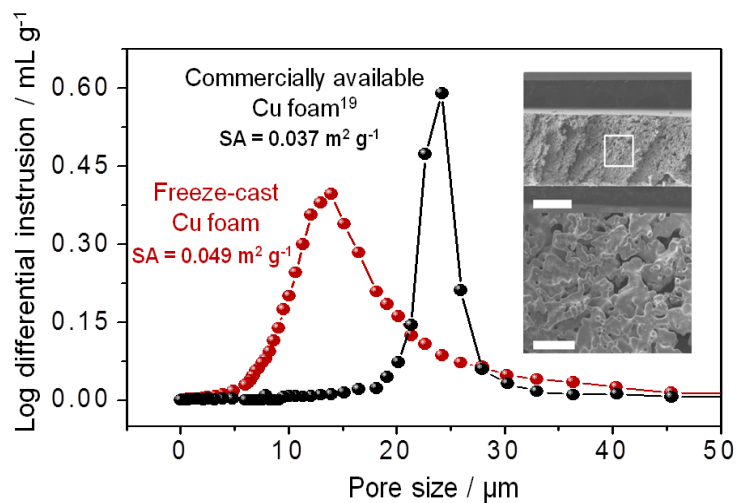

**Supplementary Figure S2** Pore size distributions of commercially available Cu foam applied to previous our work and freeze-cast Cu foam used in this work. The inset shows a cross-sectional SEM image of Cu foam via freeze-casting (top) and an enlarged SEM image of the region indicated by white rectangle in top image (bottom). Scale bars, 400  $\mu\text{m}$  and 40  $\mu\text{m}$ .

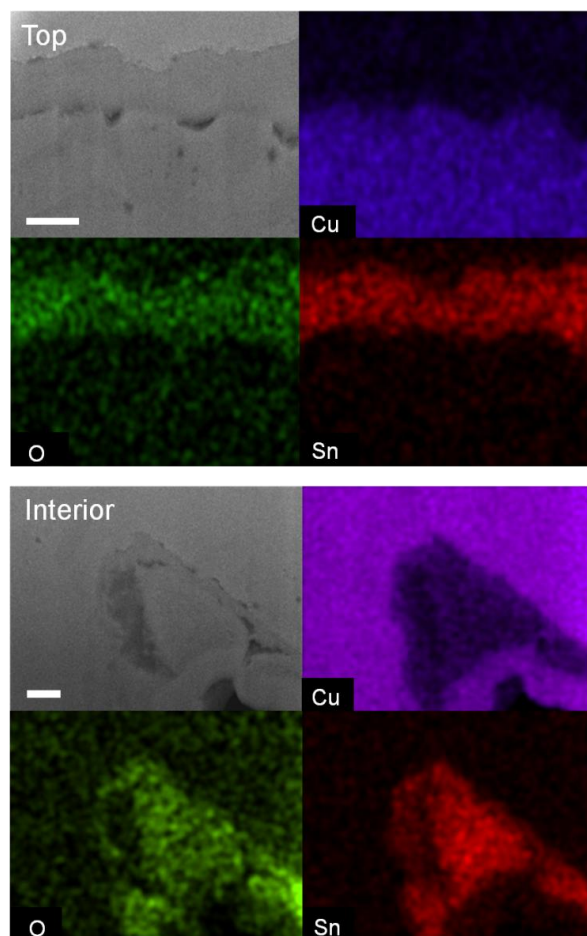

**Supplementary Figure S3** Cross-sectional SEM and EDX images of SnO<sub>2</sub>/Cu foam at top and interior regions with element mapping of Cu, O, and Sn, respectively. Scale bars, 500 nm (top) and 500 nm (interior).

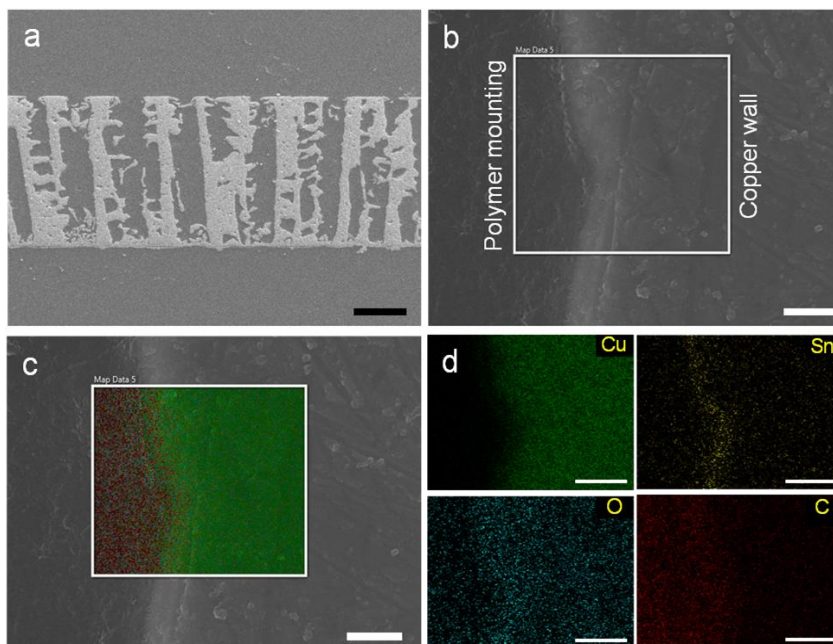

**Supplementary Figure S4** (a) An entire cross-sectional SEM image of SnO<sub>2</sub>/Cu foam. Scale bar, 100  $\mu$ m. (b) SEM image of the magnified surface on lamella in SnO<sub>2</sub>/Cu foam interior. Scale bar, 500  $\mu$ m. (c) EDX mapping image of (b). Scale bar, 500  $\mu$ m. (d) Element distribution of Cu, Sn, O, and C, respectively. Scale bar, 500  $\mu$ m.

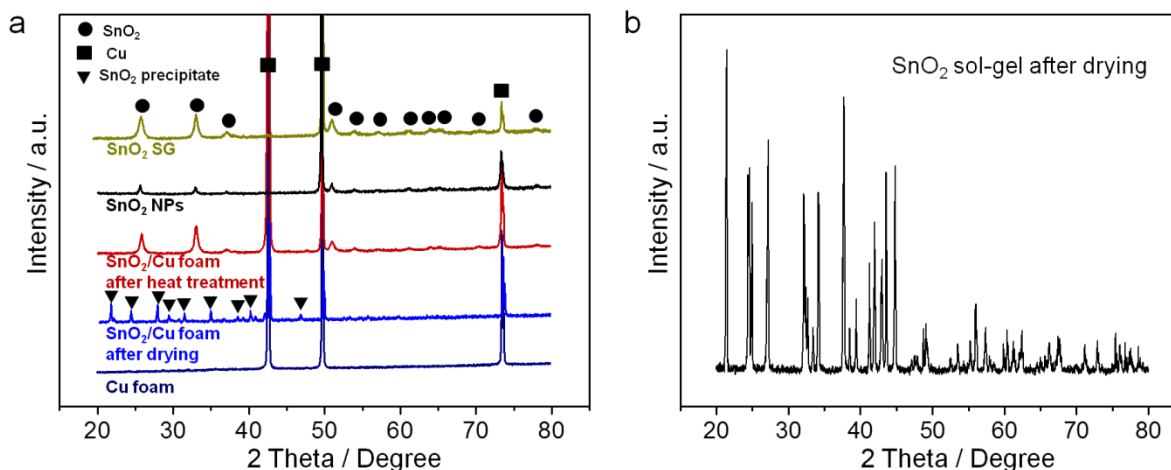

**Supplementary Figure S5** (a) XRD patterns of pristine Cu foam, SnO<sub>2</sub>/Cu foam after drying and heat treatment, SnO<sub>2</sub> NPs, and SnO<sub>2</sub> SG. (b) XRD pattern of SnO<sub>2</sub> sol-gel precipitate. There are no oxidation peaks such as CuO and Cu<sub>2</sub>O in the dried SnO<sub>2</sub>/Cu foam. Only Cu and SnO<sub>2</sub> precipitate peaks resulted from the gelation and dehydration of SnO<sub>2</sub> sol are observed.

### Details on stability evaluation in oxidation of the 3D Cu foam

In both electrodes of the dried SnO<sub>2</sub>/Cu foam and the annealed SnO<sub>2</sub>/Cu foam, the copper oxides (CuO and Cu<sub>2</sub>O) being possibly formed through wet synthesis route such as sol-gel, were not observed from XRD analysis as shown in Supplementary Fig. S5. However, due to the detection limitation of XRD analysis, trace of the CuO and Cu<sub>2</sub>O could be developed in the SnO<sub>2</sub>/Cu foam electrode. Therefore, XPS analysis was conducted to examine the surface of Cu foam in the annealed SnO<sub>2</sub>/Cu foam as the final product.

#### I. CuO

The XPS profile of annealed SnO<sub>2</sub>/Cu foam is presented in Supplementary Fig. S5c. The two peaks located at around 934.9 eV and 954.8 eV are assigned to the binding energy of Cu 2p<sub>3/2</sub> and Cu 2p<sub>1/2</sub>, respectively, which indicates the presence of Cu<sup>2+</sup> (CuO) in the SnO<sub>2</sub>/Cu foam. In addition, the shake-up satellite peak at a binding energy approximately 9 eV higher than that of Cu2p<sub>3/2</sub> further confirms the existence of the Cu<sup>2+</sup> on the surface of SnO<sub>2</sub>/Cu foam<sup>R1,2</sup>. XPS depth profiles with Ar ion beam etching were used to further probe the chemical oxidation state of SnO<sub>2</sub>/Cu foam. The surface oxide layer of CuO is not detected after Ar ion etching after from 10 s to 120 s, confirming that the Cu foam maintains the metallic character under the thin surface oxide layer after the SnO<sub>2</sub> sol-gel coating.

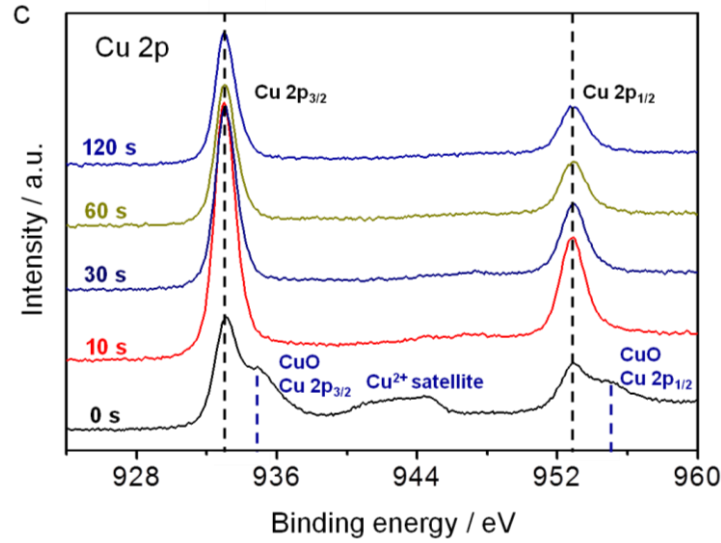

**Supplementary Figure S5 (c)** XPS profiles of SnO<sub>2</sub>/Cu foam with various Ar ion etching time.

By using the XPS analysis operating condition (240 keV, 1  $\mu$ A, and 2 x 2 mm<sup>2</sup>) and the below equation, the etching rate could be estimated<sup>R3,4</sup>.

$$\frac{z}{t} = \frac{M_w}{\rho n_A e} S j_P$$

$M_w$  = Molar weight of the target [g/mol]  
 $\rho$  = Density of material [g/cm<sup>3</sup>]  
 $n_A$  = Avogadro number [mol<sup>-1</sup>]  
 $e$  = Electron charge [A·s]  
 $S$  = Sputtering yield  
 $j_P$  = Primary ion current density [A/cm<sup>2</sup>]

$$\frac{z}{t} = \left( \frac{63.5 \text{ g}}{\text{mol}} \right) \times \left( \frac{\text{cm}^3}{8.96 \text{ g}} \right) \times \left( \frac{\text{mol}}{6.02 \times 10^{23}} \right) \times \left( \frac{1}{1.6 \times 10^{-19} \text{ A} \cdot \text{s}} \right) \times (6)^* \times \left( \frac{0.25 \times 10^{-4} \text{ A}}{\text{cm}^2} \right)$$

\* The sputtering yield of copper at 240 keV can be estimated about 6 from the paper<sup>R5</sup>.

The etching rate is calculated at 1.104 Å/s  
 And, the thickness of CuO during 10 s is about 1.1 nm.

The volume of CuO on the Cu foam can be estimated by using the surface area of Cu foam<sup>\*\*</sup> and the thickness of CuO layer.

\*\* The surface area could be calculated the specific surface area and the mass of Cu foam.

$$V_{\text{CuO}} = A_{\text{Cu foam}} \times z_{\text{CuO}} = \left( \frac{0.049 \text{ m}^2}{\text{g}} \right) \times (0.07554 \text{ g}) \times (1.1 \times 10^{-9} \text{ m})$$

From the  $0.00407 \times 10^{-9} \text{ m}^3$  of  $V_{\text{CuO}}$  and the  $6.315 \text{ g/cm}^3$  of  $\rho_{\text{CuO}}$ , the mass of CuO on Cu foam is calculated at  $0.0000257 \text{ g}$  in the  $\text{SnO}_2/\text{Cu}$  foam electrode.

## II. $\text{Cu}_2\text{O}$

In the case of  $\text{Cu}_2\text{O}$ , distinguishing it from metallic Cu in same XPS pattern is not easy due to the negligible difference of  $0.2 \text{ eV}$  between  $\text{Cu}2\text{p}_{3/2}$  binding energies of  $\text{Cu}_2\text{O}$  and Cu<sup>R6</sup>.

Although the quantitative analysis of  $\text{Cu}_2\text{O}$  through XPS analysis is difficult, by using XRD detection limitation ( $2\sim3 \text{ wt}\%$  with laboratory X-ray source and  $0.1 \text{ wt}\%$  with synchrotron radiation source)<sup>R7</sup>, approximately  $3 \text{ wt}\%$  of the sample not observed in XRD pattern may be exist to maximum value in the  $\text{SnO}_2/\text{Cu}$  foam. When the mass of sample for XRD analysis is  $0.002336 \text{ g}$ , about  $0.0000701 \text{ g}$  of  $\text{Cu}_2\text{O}$  is in the  $\text{SnO}_2/\text{Cu}$  foam electrode.

The mass contribution of CuO and  $\text{Cu}_2\text{O}$  in total active material is approximately  $2 \text{ wt}\%$  and  $5 \text{ wt}\%$ , respectively.



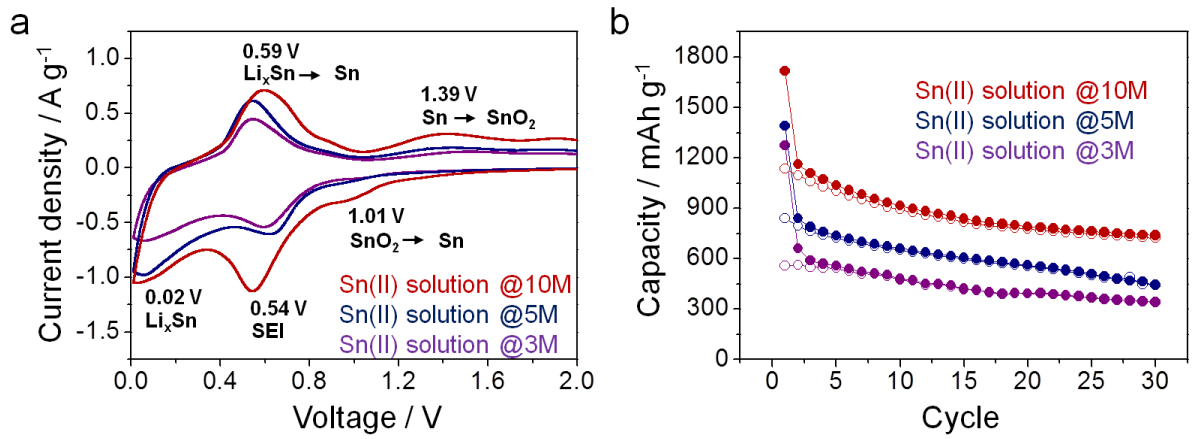

**Supplementary Figure S6** (a) Cyclic voltammograms of SnO<sub>2</sub>/Cu foam obtained from different sol concentration at a scan rate of 0.1 mV s<sup>-1</sup>. (b) Cycle performance at current rate of 1 C.

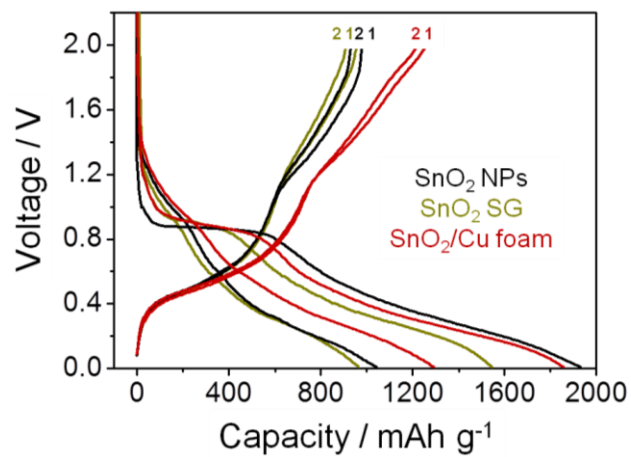

**Supplementary Figure S7** Voltage profiles of SnO<sub>2</sub>/Cu foam, SnO<sub>2</sub> SGP, and SnO<sub>2</sub> NPs during the first two cycles at 0.5 C.

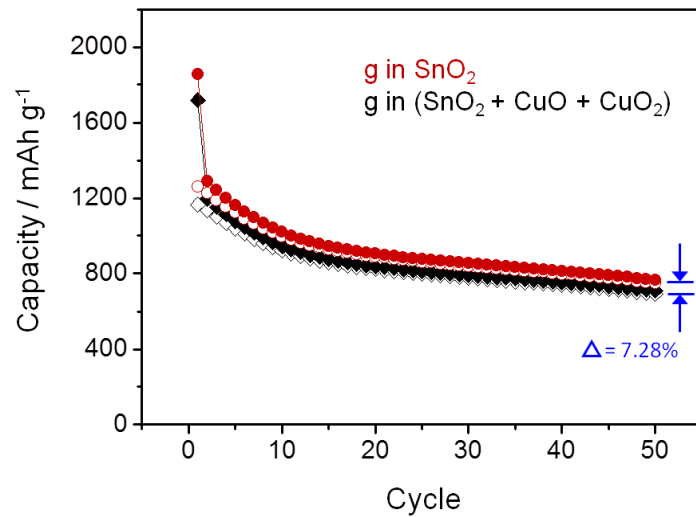

**Supplementary Figure S8** Performance comparison of SnO<sub>2</sub>/Cu foam with consideration of surface oxidation of Cu foam.

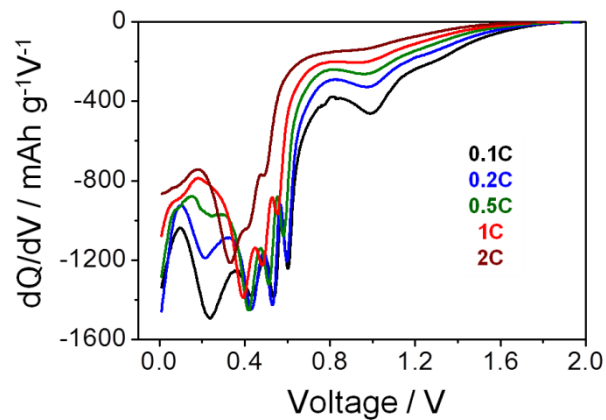

**Supplementary Figure S9** Differential capacity profiles of SnO<sub>2</sub>/Cu foam differentiated from the final discharge voltage profile (Fig. 4d) in each current rate step.

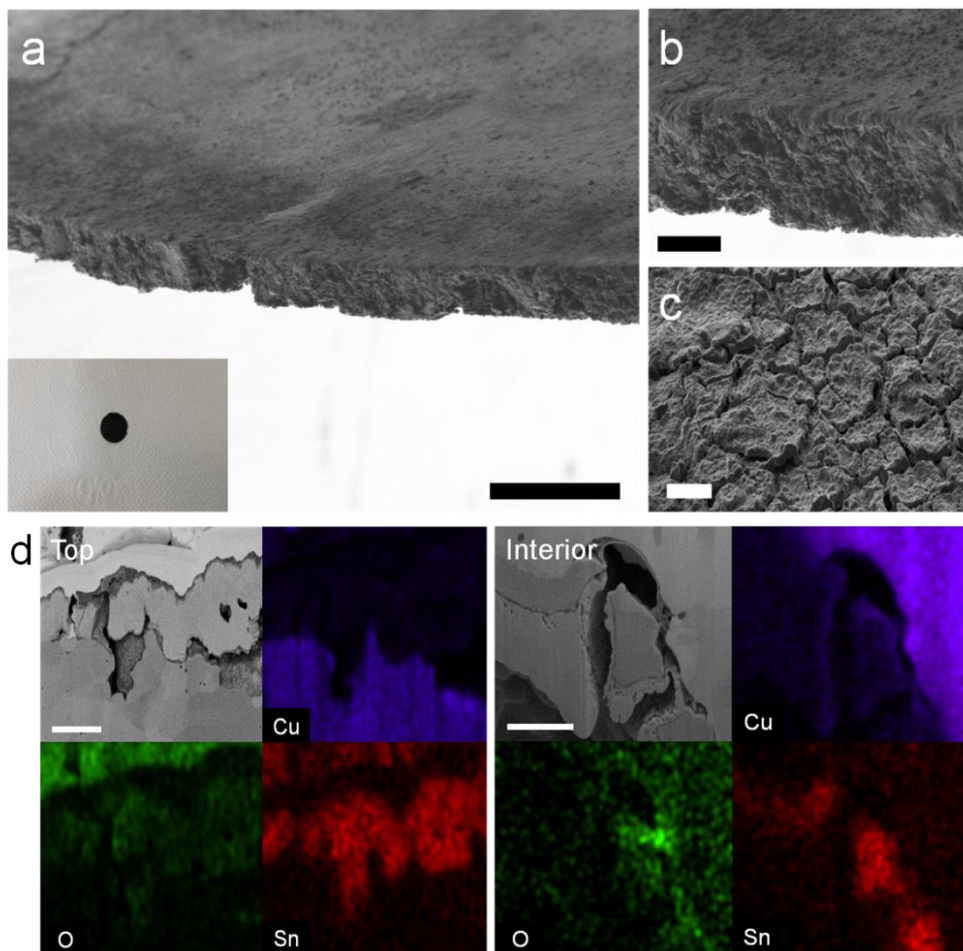

**Supplementary Figure S10** (a) SEM image of SnO<sub>2</sub>/Cu foam after 50 cycles at 0.5 C. Scale bar, 400 μm. The inset shows the photograph of disassembled SnO<sub>2</sub>/Cu foam electrode. (b) Side view and (c) Top view SEM images of the SnO<sub>2</sub>/Cu foam. Scale bars, 80 μm (Side view) and 8 μm (Top view). (d) Cross-sectional SEM and EDX images of SnO<sub>2</sub>/Cu foam after 50 cycles at 1 C at top and interior regions with element mapping of Cu, O, and Sn, respectively. Scale bars, 2 μm (top) and 1 μm (interior).

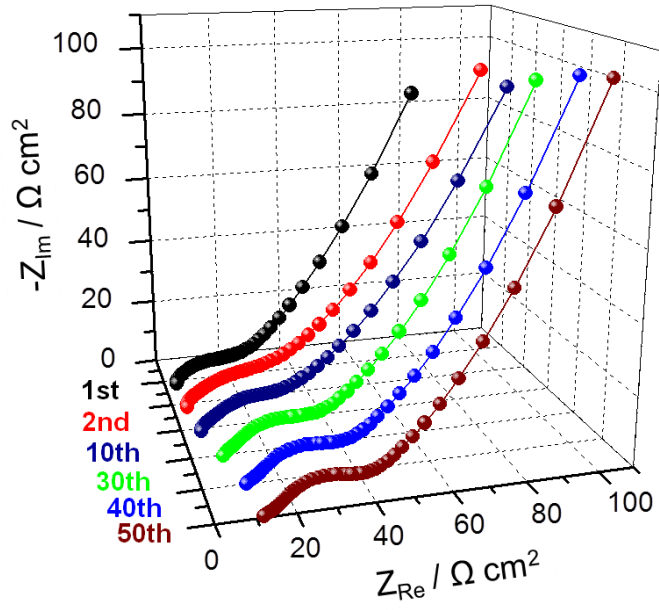

**Supplementary Figure S11** Cell impedance tests of SnO<sub>2</sub>/Cu foam after the selected cycles at 1 C.

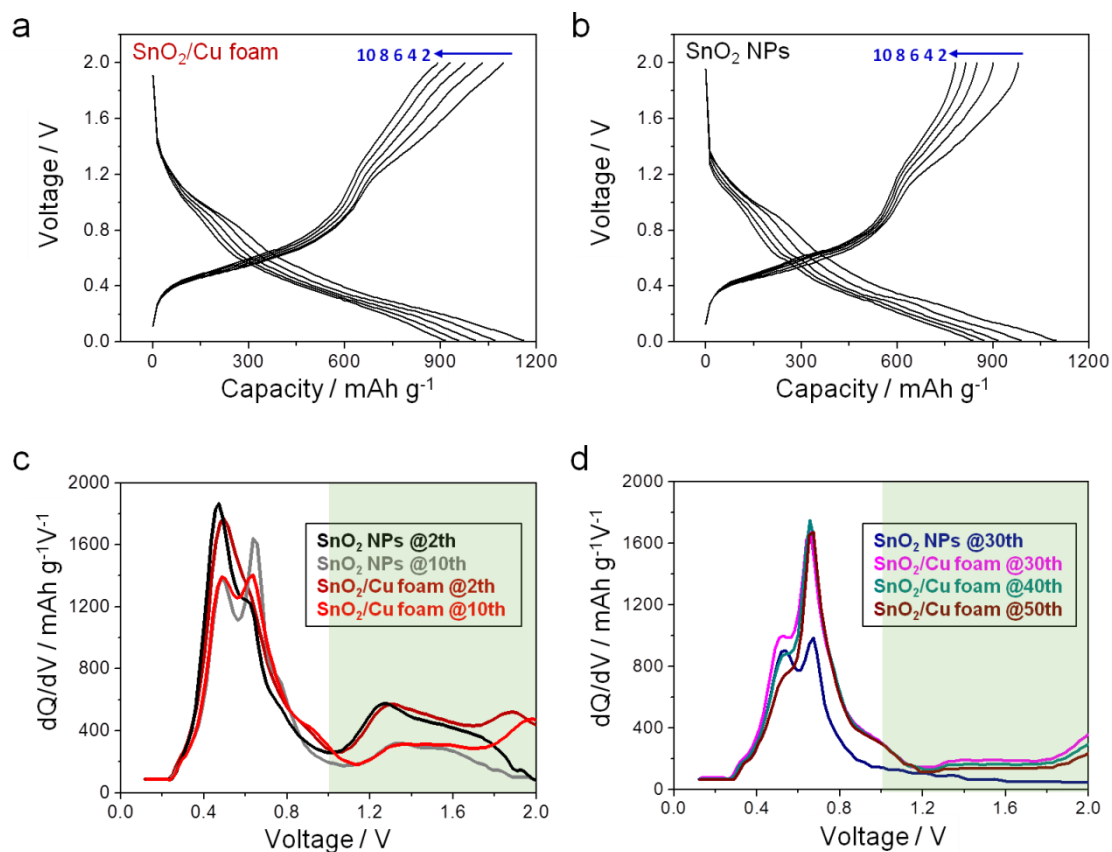

**Supplementary Figure S12** Voltage profiles of (a) SnO<sub>2</sub>/Cu foam and (b) SnO<sub>2</sub> NPs after the selected cycles at 1 C. Differential capacity profiles of the SnO<sub>2</sub>/Cu foam and SnO<sub>2</sub> NPs differentiated from the charge voltage profiles in (c) the initial period (2th and 10th cycles) and (d) the late period (30th, 40th, and 50th cycles).

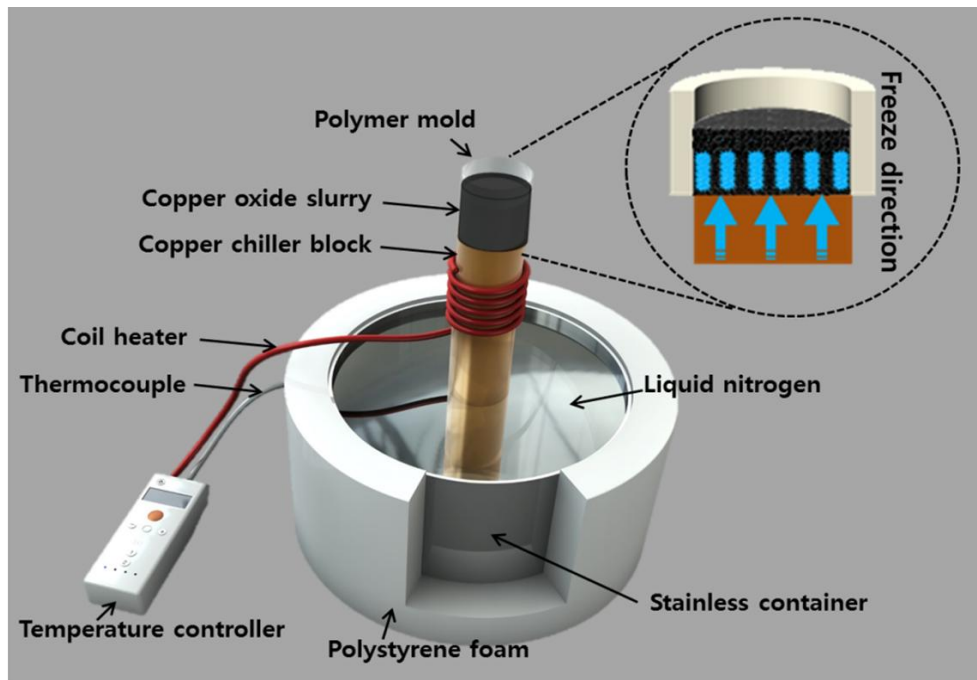

**Supplementary Figure S13** Schematic diagram of a freeze-casting apparatus.



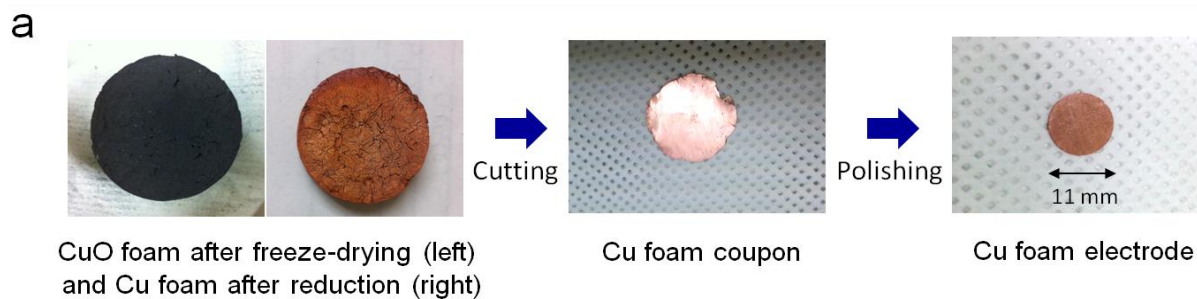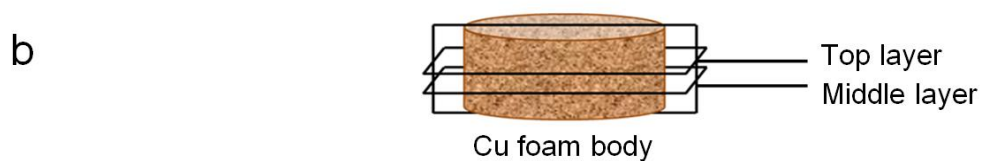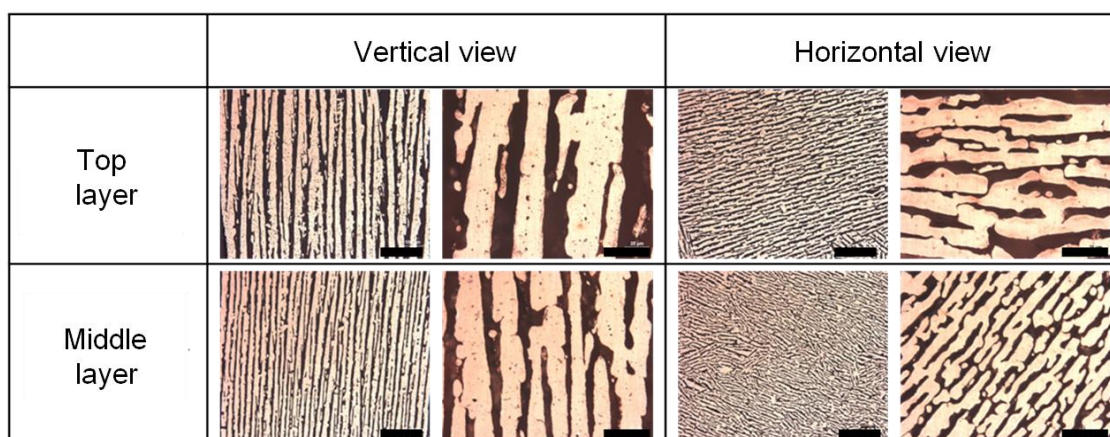

**Supplementary Figure S14** (a) Photographs of manufacturing process from CuO foam body to Cu foam electrode. (b) Optical microscopic images of the Cu foam electrode at top and middle positions. Scale bars, 200  $\mu\text{m}$  (left) and 50  $\mu\text{m}$  (right) in each individual space of a table.

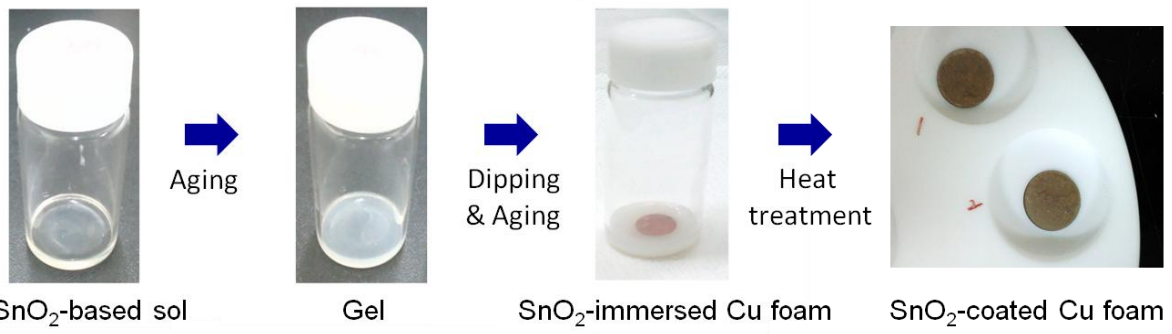

**Supplementary Figure S15** Photographs of SnO<sub>2</sub> sol-gel coating process.

- R1. Yin, M. *et al.* Copper Oxide Nanocrystals. *J. Am. Chem. Soc.* **127**, 9506-9511 (2005).
- R2. Sakai, Y., Ninomiya, S. & Hiraoka, K. XPS depth analysis of CuO by electrospray droplet impact. *Surf. Interface Anal.* **44**, 938–941 (2012).
- R3. Smentkowski, V. S. Trends in sputtering. *Progress in Surf. Sci.* **64**, 1-58 (2000).
- R4. Behrisch, R. & Wittmaack, K. *et al.* Sputtering by Particle Bombardment I, II and III. Springer Series 560, Topics in Applied Physics, Vol 47, 52 and 64 (Springer-Verlag Berlin Heidelberg, 1981, 1983 and 1991).
- R5. Sigmund, P. Sputtering Yield of Amorphous and Polycrystalline Targets. *Phys. Rev.* **184**, 383–416 (1969).
- R6. Poulston, S., Marlet, P. M., Stone, P. & Bowker, M. Surface Oxidation and Reduction of CuO and Cu<sub>2</sub>O Studied Using XPS and XAES. *Surf. Interface Anal.* **24**, 811-820 (1996).
- R7. Drowley, C. I. 1-Application of Materials Characterization Techniques to Silicon Epitaxial Growth (ed. Strausser, Y.) 30 (Butterworth Heinemann, 1993).
